# Supplementary material
Source: publisher figshare collection journal article supplement (https://tandf.figshare.com/ndownloader/files/18049436)
Supplement: Supplementary file 1 [file 18049436]

**Appendices**

**Appendix 1**

Target word sets

| **Repetition** | | **Reading** | |
| --- | --- | --- | --- |
|  |  |  |  |
| ***High*** | ***Low*** | ***High*** | ***Low*** |
| apartment | abode | animal | analogy |
| arm | acre | avenue | audit |
| audience | ally | band | border |
| bag | altitude | bridge | clash |
| building | anecdote | candidate | compression |
| butter | annex | cellar | crush |
| camp | aurora | chain | cult |
| car | beau | champion | debut |
| cattle | betrayal | chapel | defence |
| clay | bid | clothes | defiance |
| coffee | blessing | coach | despair |
| column | boast | core | dirge |
| display | brawl | country | enigma |
| drink | circuit | customer | flutter |
| drug | continent | detective | foe |
| executive | cunning | dive | fortune |
| filling | curse | driver | franchise |
| flash | deceit | earth | frenzy |
| gallery | denial | edge | fury |
| golf | dislocation | entrance | grievance |
| graduate | dismissal | forest | gush |
| grip | etiquette | ground | impediment |
| hall | expanse | hill | incline |
| professor | exterior | hotel | inhibition |
| human | flyer | industry | irritation |
| lift | forfeit | lunch | jerk |
| liquid | fraud | market | lunge |
| magazine | genius | material | margin |
| metal | gore | money | misery |
| monument | greed | mud | oath |
| motor | gulf | muscle | omen |
| music | haste | ocean | pact |
| newspaper | insight | painting | peep |
| novel | irony | paper | pioneer |
| partner | jolt | park | precaution |
| pattern | levity | penny | rebel |
| planet | loyalty | picture | receipt |
| pocket | maker | platform | regency |
| pool | marvel | pond | retreat |
| porch | mortal | quarter | rhyme |
| property | raid | radio | scorn |
| record | realm | rain | sedative |
| room | reprisal | register | sequel |
| sand | revenge | rifle | shrug |
| saw | rogue | salary | siege |
| shadow | saga | salt | sorrow |
| skirt | shaker | secretary | stride |
| smile | sneer | sheet | strut |
| soil | snort | shirt | tally |
| soldier | spree | silver | thaw |
| student | thinker | smoke | theft |
| sun | treaty | staff | tip |
| tape | tremor | station | torment |
| teacher | tumble | supper | trance |
| uniform | utterance | university | trim |
| valley | verity | water | tuck |
| victim | vigil | winter | turner |
| village | vow | witness | venture |
| weapon | whack | wound | watt |
| wedding | whirl | writing | wiggle |

**Appendix 2**

Mean and standard deviation (in parentheses) statistics of psycholinguistic values for target word sets.

|  |  | **Repetition** | | **Reading** | |
| --- | --- | --- | --- | --- | --- |
|  |  | ***High*** | ***Low*** | ***High*** | ***Low*** |
| KF frequency |  | 82.82 (78.53) | 7.60 (6.74) | 86.33 (80.04) | 7.62 (6.60) |
| Celex frequency |  | 73.947 (87.39) | 6.34 (5.80) | 79.94 (88.60) | 8.76 (12.3) |
| Log frequency |  | 1.71 (0.36) | 0.73 (0.36) | 1.72 (0.40) | 0.81 (0.38) |
| Concreteness |  | 549.67 (47.53) | 366.60 (76.53) | 554.03 (51.03) | 365.67 (61.61) |
| Familiarity |  | 550.83 (52.83) | 414.08 (58.47) | 556.97 (52.45) | 422.88 (58.8) |
| Imageability |  | 561.55(42.96) | 408.17 (61.63) | 563.08 (48.75) | 408.28 (65.14) |
| Phoneme number |  | 4.93 (1.74) | 4.93 (1.76) | 5.00 (1.74) | 4.98 (1.81) |
| Syllable number |  | 1.82 (0.75) | 1.93 (0.82) | 1.88 (0.83) | 1.87 (0.89) |
| Letter number |  | 5.77 (1.70) | 5.93 (1.66) | 5.97 (1.56) | 5.98 (1.87) |
| Phonological neighbourhood density | | 7.5 (8.79) | 6.13 (8.62) | 8.18 (9.78) | 6.2 (8.27) |
| Orthographic neighbourhood density | | 3.90 (5.04) | 2.47 (3.09) | 3.04 (4.47) | 2.67 (3.43) |
| Phoneme position frequency | | 0.26 (0.11) | 0.26 (0.13) | 0.27 (0.13) | 0.25 (0.11) |
| Biphone position frequency | | 0.021 (0.02) | 0.02 (0.02) | 0.021 (0.02) | 0.02 (0.02) |
| Bigram position frequency | | 1685.03 (893.19) | 1654.32 (1041.67) | 1931.03 (936.26) | 1645.25 (1002.95) |

**Appendix 3**

Number of correct, nonword and other responses types observed on tasks of single word repetition and reading for each participant.

|  |  | Repetition | | | | | | | | | | |  | | Reading | | | | | | | | | | |
| --- | --- | --- | --- | --- | --- | --- | --- | --- | --- | --- | --- | --- | --- | --- | --- | --- | --- | --- | --- | --- | --- | --- | --- | --- | --- |
|  |  | **Participant code** | | | | | | | | | | | | | | | | | | | | | | | |
| Response type | Lexical availability | **A** | **B** | **C** | **D** | **E** | **F** | **G** | **H** | **I** | **J** |  | | **A** | | **B** | **C** | **D** | **E** | **F** | **G** | **H** | **I** | **J** |
| Correct | Low | 43 | - | 2 | 3 | 0 | 17 | 3 | 0 | 0 | 0 |  | | 57 | | 27 | - | 6 | 0 | 0 | 0 | 0 | 0 | 0 |
|  | High | 51 | - | 9 | 26 | 3 | 22 | 11 | 0 | 0 | 0 |  | | 58 | | 39 | - | 20 | 2 | 2 | 0 | 1 | 1 | 0 |
| Nonword | Low | 8 | - | 35 | 51 | 53 | 37 | 45 | 56 | 60 | 58 |  | | 3 | | 27 | - | 44 | 44 | 51 | 56 | 59 | 60 | 59 |
|  | High | 4 | - | 25 | 27 | 27 | 23 | 43 | 59 | 52 | 54 |  | | 1 | | 17 | - | 29 | 37 | 54 | 60 | 49 | 53 | 59 |
| Formal | Low | 6 | - | 5 | 4 | 2 | 4 | 8 | 1 | 0 | 0 |  | | 0 | | 6 | - | 4 | 11 | 2 | 1 | 1 | 0 | 0 |
|  | High | 5 | - | 5 | 4 | 8 | 11 | 5 | 1 | 2 | 1 |  | | 1 | | 4 | - | 7 | 14 | 1 | 0 | 5 | 3 | 0 |
| Unrelated | Low | 2 | - | 10 | 1 | 5 | 1 | 3 | 3 | 0 | 1 |  | | 0 | | 0 | - | 4 | 5 | 7 | 3 | 0 | 0 | 1 |
|  | High | 0 | - | 6 | 3 | 21 | 1 | 0 | 0 | 6 | 4 |  | | 0 | | 0 | - | 3 | 7 | 3 | 0 | 4 | 3 | 1 |
| Semantic | Low | 0 | - | 0 | 0 | 0 | 0 | 0 | 0 | 0 | 0 |  | | 0 | | 0 | - | 0 | 0 | 0 | 0 | 0 | 0 | 0 |
|  | High | 0 | - | 0 | 0 | 1 | 1 | 0 | 0 | 0 | 0 |  | | 0 | | 0 | - | 0 | 0 | 0 | 0 | 0 | 0 | 0 |
| Mixed | Low | 1 | - | 0 | 1 | 0 | 0 | 0 | 0 | 0 | 0 |  | | 0 | | 0 | - | 2 | 0 | 0 | 0 | 0 | 0 | 0 |
|  | High | 0 | - | 0 | 0 | 0 | 2 | 0 | 0 | 0 | 0 |  | | 0 | | 0 | - | 1 | 0 | 0 | 0 | 1 | 0 | 0 |
| Non-response | Low | 0 | - | 8 | 0 | 0 | 1 | 1 | 0 | 0 | 1 |  | | 0 | | 0 | - | 0 | 0 | 0 | 0 | 0 | 0 | 0 |
|  | High | 0 | - | 15 | 0 | 0 | 0 | 1 | 0 | 0 | 1 |  | | 0 | | 0 | - | 0 | 0 | 0 | 0 | 0 | 0 | 0 |

Note: hyphen indicates missing data.
